# Supplementary material for: Resistance of mature and elderly bodybuilders to anaerobic energy supply load
Source: PeerJ. 2025 Aug 28;13:e19844. doi: 10.7717/peerj.19844 (PMC12399078; doi:10.7717/peerj.19844)
Supplement: Supplemental Information 1 [file peerj-13-19844-s001.xlsx]

## Sheet: Лист1
																Groups of participants:
Results of the maximum strength (1 RM) in study participants during control tests, n=60																А -men of early mature age;
																В - men of late mature age;
																С - elderly men;
	1RM - Hammer Chest Press					1RM Hammer Lat Pulldown							1RM Hammer Triceps Extension
	group A	group B	group C				group A	group B	group C				group A	group B	group C
1)	91.5	90.5	68.5			1)	65.5	68.5	59.5			1)	45.5	38.5	38.5
2)	86.5	96	78			2)	65	77	66.5			2)	39.5	43.5	43
3)	86	93.5	70			3)	70	70	61.5			3)	40	41	39
4)	95	89	72.5			4)	72.5	72.5	63.5			4)	44.5	38	41
5)	97	90	68			5)	74	74	59			5)	45.5	44.5	37.5
6)	92	92	69			6)	68.5	70	62			6)	42.5	42.5	38.5
7)	87.5	97	72.5			7)	70	76.5	65.5			7)	39	46	42
8)	90	90.5	71			8)	71	71	67			8)	43.5	41.5	40.5
9)	85	95	78.5			9)	68.5	76	67.5			9)	40.5	45.5	43.5
10)	90.5	91.5	69.5			10)	65	74	66.5			10)	44	41.5	38.5
11)	89	89.5	68			11)	74	74	65			11)	42.5	38	38
12)	88	94	77			12)	66	75	68			12)	40	44	42.5
13)	85.5	95.5	74			13)	67.5	70.5	67.5			13)	42.5	44	41.5
14)	87.5	92.5	68.5			14)	70	70	63			14)	41	43.5	38
15)	97	97	76			15)	67	71	66			15)	44.5	46	42
16)	86	91	76			16)	65	68.5	68.5			16)	39	42.5	42.5
17)	88	94.5	70			17)	72	72	65.5			17)	42.5	42.5	39
18)	89	91.5	74.5			18)	64	72	65			18)	43.5	44.5	42.5
19)	95	95	73.5			19)	72.5	70.5	64.5			19)	46	45	41
20)	85	96.5	77.5			20)	68	75.5	67			20)	41.5	44.5	43

## Sheet: Лист2
Results of the projectile working mass parameters (m1, kg) in study participants during the first test,n=60															Groups of participants:
															А - men of early mature age;
	m1 - in the creatine phosphokinase energy supply mode (Ra=0.74)														В - men of late mature age;
															С - elderly men;
		m1 Hammer Chest Press					m1 Hammer Lat Pulldown							m1 Hammer Triceps Extension
		group A	group B	group C				group A	group B	group C				group A	group B	group C
	1)	67.7	67	50.7			1)	48.5	50.7	44			1)	33.7	28.5	28.5
	2)	64	71	57.7			2)	48	57	49.2			2)	29.2	32.2	31.8
	3)	63.4	69.2	51.8			3)	51.8	51.8	45.5			3)	29.6	30.3	28.8
	4)	70.3	65.8	53.6			4)	53.6	53.6	47			4)	33	28.1	30.3
	5)	71.8	66.6	50.3			5)	54.7	54.7	43.7			5)	33.7	33	27.7
	6)	68	68	51			6)	50.7	51.8	46			6)	31.4	31.5	28.5
	7)	64.7	71.8	53.6			7)	51.8	56.6	48.5			7)	28.8	34	31
	8)	66.6	67	52.5			8)	52.5	52.5	49.5			8)	32.2	30.7	30
	9)	63	70.3	58			9)	50.7	56.2	50			9)	30	33.7	32.2
	10)	67	67.7	51.4			10)	48.1	54.7	49.2			10)	32.5	30.7	28.5
	11)	65.8	66.2	50.3			11)	54.7	54.7	48			11)	31.5	28	28.1
	12)	65.1	69.5	57			12)	48.8	55.5	50.3			12)	29.6	32.5	31.5
	13)	63.3	70.7	54.7			13)	50	52.2	50			13)	31.5	32.5	30.7
	14)	64.7	68.5	50.7			14)	51.8	51.8	46.6			14)	33.3	32.2	28.1
	15)	71.8	71.8	56.2			15)	49.6	52.5	48.8			15)	33	34	31.1
	16)	63.6	67.3	56.2			16)	48.1	50.7	50.7			16)	28.8	31.5	31.5
	17)	65	70	51.8			17)	53.3	53.3	48.5			17)	31.5	31.5	28.26
	18)	66	67.7	55			18)	47.3	53.3	48			18)	32.2	33	31.45
	19)	70.3	70.3	54.4			19)	53.6	52.2	47.7			19)	34	33.3	30.34
	20)	62.9	71.4	57.4			20)	50.3	55.8	49.6			20)	30.7	33	31.82

## Sheet: Лист3
Projectile working mass parameters (m2, kg) in study participants during the second control test,n=60															Groups of participants:
															А - men of early mature age;
	m2 - in the anaerobic glycolysis (Ra=0.67) energy supply mode														В - men of late mature age;
															С - elderly men;
		m2 Hammer Chest Press					m2 Hammer Lat Pulldown							m2 Hammer Triceps Extension
		group A	group B	group C				group A	group B	group C				group A	group B	group C
	1)	61.3	60.63	46			1)	44	46	39.8			1)	30.5	25.8	25.8
	2)	58	64.3	52.2			2)	43.5	51.6	44.5			2)	26.5	29	28.8
	3)	57.6	62.6	47			3)	47	47	41.2			3)	26.8	27.5	26.1
	4)	63.6	59.6	48.5			4)	48.6	48.6	42.5			4)	29.8	25.5	27.5
	5)	65	60.3	45.5			5)	49.6	49.6	39.5			5)	30.5	29.8	25.1
	6)	61.6	61.64	46.2			6)	46	47	41.5			6)	28.5	28.5	25.8
	7)	58.6	65	48.6			7)	47	51.3	43.8			7)	26	30.8	28.1
	8)	60.3	60.6	47.6			8)	47.6	47.6	44.8			8)	29	27.8	27
	9)	57	63.7	52.6			9)	46	51	45.2			9)	27	30.5	29.1
	10)	60.6	61.3	46.5			10)	43.5	49.5	44.5			10)	29.5	27.8	25.8
	11)	59.6	60	45.5			11)	49.6	49.5	43.5			11)	28.5	25.5	25.5
	12)	59	63	51.6			12)	44.2	50.2	45.5			12)	26.8	29.5	28.5
	13)	57.3	64	49.6			13)	45.2	47.2	45.2			13)	28.5	29.5	27.8
	14)	58.6	62	46			14)	47	47	42.2			14)	27.5	29	25.5
	15)	65	65	50.9			15)	45	47.5	44.2			15)	29.8	30.8	28.1
	16)	57.6	61	60			16)	43.5	46	45.9			16)	26	28.5	28.5
	17)	59	63.3	47			17)	48.2	48.2	43.9			17)	28.5	28.5	26
	18)	59.6	61.3	49.9			18)	43	48.2	43.5			18)	29	29.8	28.5
	19)	63.6	63.6	49.2			19)	48.6	47.2	43.2			19)	30.8	30.2	27.5
	20)	57	64.6	51.9			20)	45.5	50.5	44.9			20)	27.8	29.8	28.8

## Sheet: Лист4
Results of load volume parameters in a set (Wn1, kg) in study participants during the first control test,n=60																	Groups of participants:
																	А - men of early mature age;
	Wn1 - in the creatine phosphokinase (Ra=0,74) energy supply mode																В - men of late mature age;
																	С - elderly men;
		Wn1 Hammer Chest Press					Wn1 Hammer Lat Pulldown							Wn1 Hammer Triceps Extension
		group A	group B	group C				group A	group B	group C				group A	group B	group C
	1)	270.8	268	202.8			1)	194	202.8	176			1)	134.8	114	114
	2)	256	284	230.8			2)	192	228	196.8			2)	116.8	128.8	127.2
	3)	253.6	276	207.2			3)	207.2	207.2	182			3)	118.4	121.2	115.2
	4)	281.2	263.2	214.4			4)	214.4	214.4	188			4)	132	112.4	121.2
	5)	287.2	266.4	201.2			5)	218.8	218.8	174.8			5)	134.8	132	110.8
	6)	272	272	204			6)	202.8	207.2	184			6)	125.6	126	114
	7)	258.8	287.2	214.4			7)	207.2	226.4	194			7)	115.2	136	124
	8)	266.4	268	210			8)	210	210	198			8)	128.8	122.8	120
	9)	252	281.2	232			9)	202.8	224.8	200			9)	120	134.8	128.8
	10)	268	270.8	205.6			10)	192.4	218.8	196.8			10)	130	122.8	114
	11)	263.2	264.8	201.2			11)	218.8	218.8	192			11)	126	112	112.4
	12)	260.4	278	228			12)	195.2	222	201.2			12)	118.4	130	126
	13)	253.2	282.8	218.8			13)	200	208.8	200			13)	126	130	122.8
	14)	258.8	274	202.8			14)	207.2	207.2	186.4			14)	133.2	128.8	112.4
	15)	287.2	287.2	224.8			15)	198.4	210	195.2			15)	132	136	124.4
	16)	254.4	269.2	224.8			16)	192.4	202.8	202.8			16)	115.2	126	126
	17)	260	280	207.2			17)	213.2	213.2	194			17)	126	126	113.04
	18)	264	270.8	220			18)	189.2	213.2	192			18)	128.8	132	125.8
	19)	281.2	281.2	217.6			19)	214.4	208.8	190.8			19)	136	133.2	121.36
	20)	251.6	285.6	229.6			20)	201.2	223.2	198.4			20)	122.8	132	127.28

## Sheet: Лист5
Results of the load volume in a set (Wn2, kg) in study participants during the second control test,n=60																	Groups of participants:
																	А - men of early mature age;
	Wn2 - in the anaerobic glycolysis (Ra=0,67) energy supply mode																В - men of late mature age;
																	С - elderly men;
		Wn2 Hammer Chest Press					Wn2 Hammer Lat Pulldown							Wn2 Hammer Triceps Extension
		group A	group B	group C				group A	group B	group C				group A	group B	group C
	1)	490.4	484.8	368			1)	352	368	318.4			1)	244	206.4	206.4
	2)	464	514.4	417.6			2)	348	412.8	356			2)	212	232	230.4
	3)	460.8	500.8	376			3)	376	376	329.6			3)	214.4	220	208.8
	4)	508.8	476.8	388			4)	388.8	388.8	340			4)	238.4	204	220
	5)	520	482.4	364			5)	396.8	396.8	316			5)	244	238.4	200.8
	6)	492.8	492.8	369.6			6)	368	376	332			6)	228	228	206.4
	7)	468.8	520	388.8			7)	376	410.4	350.4			7)	208	246.4	224.8
	8)	482.4	484.8	380.8			8)	380.8	380.8	358.4			8)	232	222.4	216
	9)	456	509.6	420.8			9)	368	408	361.6			9)	216	244	232.8
	10)	484.8	490.4	372			10)	348	396	356			10)	236	222.4	206.4
	11)	476.8	480	364			11)	396.8	396	348			11)	228	204	204
	12)	472	504	412.8			12)	353.6	401.6	364			12)	214.4	236	228
	13)	458.4	512	396.8			13)	361.6	377.6	361.6			13)	228	236	222.4
	14)	468.8	496	368			14)	376	376	337.6			14)	220	232	204
	15)	520	520	407.2			15)	360	380	353.6			15)	238.4	246.4	224.8
	16)	460.8	488	480			16)	348	368	367.2			16)	208	228	228
	17)	472	506.4	376			17)	385.6	385.6	351.2			17)	228	228	208
	18)	476.8	490.4	399.2			18)	344	385.6	348			18)	232	238.4	228
	19)	508.8	508.8	393.6			19)	388.8	377.6	345.6			19)	246.4	241.6	220
	20)	456	516.8	415.2			20)	364	404	359.2			20)	222.4	238.4	230.4

## Sheet: Лист6
Results of the heart variability rate (VCR) in study participants before exercise,n=60															Groups of participants:
															А -men of early mature age;
															В - men of late mature age;
															С - elderly men;
		SDNN, mc				VLF, %					LF, %					HF, %					LF/HF
	group A	group B	group C			group A	group B	group C			group A	group B	group C			group A	group B	group C			group A	group B	group C
1)	51.6	143.1	38.5		1)	17.29	10.53	10.27		1)	61.34	50.23	67.24		1)	21.37	39.24	22.49		1)	2.87	1.28	2.99
2)	53.9	138.4	40.2		2)	19.61	8.04	14.97		2)	59.88	51.45	65.88		2)	20.51	40.51	19.15		2)	2.92	1.27	3.44
3)	55.2	130.9	44.8		3)	18.74	5.27	19.68		3)	60.37	53.72	61.77		3)	20.89	41.01	18.55		3)	2.89	1.31	3.33
4)	52.9	146.8	37.1		4)	11.61	8.45	14.23		4)	64.24	52.59	64.38		4)	21.15	38.96	21.39		4)	2.9	1.35	3.01
5)	56	137.7	43.6		5)	20.27	3.53	17.12		5)	59.18	54.16	64.28		5)	20.55	42.31	18.63		5)	2.88	1.28	3.45
6)	56.5	143.6	42.2		6)	17.83	11.47	20.2		6)	60.88	49.87	61.58		6)	21.29	38.66	18.22		6)	2.86	1.29	3.38
7)	52.3	133.9	41.9		7)	19.63	4.65	14.57		7)	59.92	53.71	66.32		7)	20.45	41.64	19.11		7)	2.93	1.29	3.47
8)	54.4	145.8	45.4		8)	15.12	3.93	16.42		8)	63.17	55.19	63.87		8)	21.71	40.88	19.71		8)	2.91	1.35	3.24
9)	55.8	144.2	39.6		9)	16.68	6.68	13.06		9)	61.79	53.27	65.79		9)	21.53	40.05	21.15		9)	2.87	1.33	3.11
10)	53.8	137.2	45.1		10)	19.21	3.75	18.03		10)	59.86	53.85	62.86		10)	20.93	42.4	19.11		10)	2.86	1.27	3.29
11)	54.2	135.8	47.4		11)	19.3	5.6	16.92		11)	60.11	52.63	64.11		11)	20.59	41.77	18.97		11)	2.92	1.26	3.38
12)	53.5	144	39.4		12)	16.11	8.84	21.12		12)	62.49	51.18	60.49		12)	21.4	39.98	18.39		12)	2.92	1.28	3.29
13)	56.7	146.4	42.2		13)	19.65	10.76	11.91		13)	59.96	50.44	68.16		13)	20.39	38.8	19.93		13)	2.94	1.3	3.42
14)	50.9	138.8	44.7		14)	17.08	7.55	21.69		14)	61.55	52.77	60.55		14)	21.37	39.68	17.76		14)	2.88	1.33	3.41
15)	57.2	139.6	45.9		15)	21.94	5.93	17.13		15)	57.89	52.81	63.82		15)	20.17	41.26	19.05		15)	2.87	1.28	3.35
16)	56.3	139.2	46.4		16)	18.72	3.34	15.52		16)	60.44	54.08	64.74		16)	20.84	42.58	19.74		16)	2.9	1.27	3.28
17)	55.8	140.7	41.3		17)	12.94	9.91	14.63		17)	64.85	50.76	64.85		17)	22.21	39.33	20.52		17)	2.92	1.29	3.16
18)	53.8	144.4	40.9		18)	15.97	10.78	14.15		18)	62.43	51.09	66.43		18)	21.6	38.13	19.42		18)	2.89	1.34	3.42
19)	51.7	138.8	39.7		19)	15.79	6.2	12.52		19)	62.51	53.37	67.51		19)	21.7	40.43	19.97		19)	2.88	1.32	3.38
20)	54.7	137.2	43.6		20)	21.61	4.25	19.91		20)	58.29	54.12	61.29		20)	20.1	41.63	18.8		20)	2.9	1.3	3.26

## Sheet: Лист7
VCR results in study participants after the first control test,n=60															Groups of participants:
															А -men of early mature age;
															В - men of late mature age;
															С - elderly men;
		SDNN, mc				VLF, %					LF, %					HF, %					LF/HF
	group A	group B	group C			group A	group B	group C			group A	group B	group C			group A	group B	group C			group A	group B	group C
1)	29.9	192.7	59.4		1)	52.37	24.27	16.11		1)	41.22	38.24	41.52		1)	6.41	37.49	42.37		1)	6.43	1.02	0.98
2)	33.1	188.9	67.5		2)	56.08	25.79	17.09		2)	38.22	36.54	42.66		2)	5.7	37.67	40.25		2)	6.71	0.97	1.06
3)	29.7	202.4	84.6		3)	53.59	18.93	23.3		3)	40.04	37.25	40		3)	6.37	43.82	36.7		3)	6.29	0.85	1.09
4)	36.2	195.3	85.3		4)	54.4	24.7	26.51		4)	39.08	37.46	39.78		4)	6.52	37.84	33.71		4)	5.99	0.99	1.18
5)	30.4	192.5	80.1		5)	52.9	22.98	14.08		5)	40.81	38.51	44.81		5)	6.29	38.51	41.11		5)	6.49	1	1.09
6)	32.3	189.3	75.4		6)	50.21	27.45	17.73		6)	43.18	38	44.18		6)	6.61	34.55	38.09		6)	6.53	1.1	1.16
7)	35.9	199.8	80.7		7)	51.22	20.24	17.26		7)	42.37	37.56	42.18		7)	6.41	42.2	40.56		7)	6.61	0.89	1.04
8)	29.3	196.8	69.1		8)	55.16	14.77	28.12		8)	38.71	38.91	38.91		8)	6.13	46.32	32.97		8)	6.32	0.84	1.18
9)	31.8	201.8	73.5		9)	51.44	11.28	21.74		9)	41.55	41.02	42.85		9)	7.01	47.7	35.41		9)	5.93	0.86	1.21
10)	35.5	197.5	75.2		10)	51.06	15.99	13.58		10)	42.85	38.6	43.85		10)	6.09	45.41	42.57		10)	7.03	0.85	1.03
11)	33.7	193.3	83.2		11)	54.36	15.76	20.47		11)	39.58	39.19	39.16		11)	6.06	45.05	40.37		11)	6.53	0.87	0.97
12)	38.8	208.4	84.9		12)	52.87	16.53	23.08		12)	40.84	37.86	40.29		12)	6.29	45.61	36.63		12)	6.49	0.83	1.1
13)	32.5	196.6	78.5		13)	54.14	15.91	20.28		13)	39.81	38.88	42.81		13)	6.05	45.21	36.91		13)	6.58	0.86	1.16
14)	36.4	198.1	68.8		14)	51.66	12.56	17.4		14)	42.11	40.43	42.11		14)	6.23	47.01	40.49		14)	6.76	0.86	1.04
15)	34.6	189.5	80		15)	47.9	18.02	9.49		15)	44.65	39.94	44.33		15)	7.45	42.04	46.18		15)	5.99	0.95	0.96
16)	28.7	204.7	82.2		16)	56.15	13.25	25.26		16)	38.02	41.33	40.92		16)	5.83	45.42	33.82		16)	6.52	0.91	1.21
17)	33.1	205.3	85.8		17)	52.49	16.27	19.07		17)	41.29	38.47	43.29		17)	6.22	45.26	37.64		17)	6.64	0.85	1.15
18)	35.9	192.7	77.5		18)	49.64	17.02	17.03		18)	43.89	37.88	42.89		18)	6.47	45.1	40.08		18)	6.78	0.84	1.07
19)	33.7	194.4	79.3		19)	55.06	21.04	23.59		19)	39.36	39.28	41.36		19)	5.58	39.68	35.05		19)	7.06	0.99	1.18
20)	35.5	198	80.7		20)	50.05	19.91	11.61		20)	43.22	37.26	43.06		20)	6.73	42.83	45.33		20)	6.42	0.87	0.95

## Sheet: Лист8
VCR results in study participants after the second control test,n=60															Groups of participants:
															А -men of early mature age;
															В - men of late mature age;
															С - elderly men;
		SDNN, mc				VLF, %					LF, %					HF, %					LF/HF
	group A	group B	group C			group A	group B	group C			group A	group B	group C			group A	group B	group C			group A	group B	group C
1)	62.9	148.7	33.2		1)	25.33	2.84	12.67		1)	47.91	42.88	74.89		1)	26.76	54.28	12.44		1)	1.79	0.79	6.02
2)	70.2	154.2	28.4		2)	26.38	14.21	11.19		2)	47.33	41.34	75.83		2)	26.29	44.45	12.98		2)	1.8	0.93	5.84
3)	71.4	158.8	30.6		3)	23.62	1.92	15.87		3)	49.58	43.89	71.67		3)	26.8	54.19	12.46		3)	1.85	0.81	5.75
4)	69	156.5	34.1		4)	28.9	7.08	10.26		4)	46.24	44.27	77.14		4)	24.86	48.65	12.6		4)	1.86	0.91	6.12
5)	71.7	152.6	31.8		5)	25.52	9.4	8.77		5)	48.07	41.36	76.82		5)	26.41	49.24	14.41		5)	1.82	0.84	5.33
6)	67.5	168.9	27.7		6)	29.88	8.54	10.72		6)	46.19	42.55	76.19		6)	23.93	48.91	13.09		6)	1.93	0.87	5.82
7)	63.5	148.3	29.6		7)	25.03	0.89	8.62		7)	48	44.05	77.34		7)	26.97	55.06	14.04		7)	1.78	0.8	5.51
8)	65.9	165.1	36.4		8)	26.89	9.3	14.68		8)	47.09	40.03	72.53		8)	26.02	50.67	12.79		8)	1.81	0.79	5.67
9)	68.4	155	37.8		9)	29.19	17.57	13.68		9)	45.79	39.97	74.59		9)	25.02	42.46	11.73		9)	1.83	0.8	6.36
10)	65.3	160.7	33.2		10)	21	5.25	11.99		10)	51.28	43.56	75.67		10)	27.72	51.25	12.34		10)	1.85	0.85	6.13
11)	68.3	153.2	28.4		11)	25.59	2.53	16.41		11)	47.93	42.71	72.49		11)	26.48	54.76	11.1		11)	1.81	0.78	6.53
12)	61.2	150.5	35.1		12)	19.69	7.05	7.89		12)	52.33	41.88	77.92		12)	27.98	51.07	14.19		12)	1.87	0.82	5.49
13)	62.8	167.7	29.6		13)	24.98	6.15	10.21		13)	49.15	42	76.14		13)	25.87	51.85	13.65		13)	1.9	0.81	5.58
14)	71.1	159.3	40.2		14)	20.76	8.53	9.22		14)	50.74	40.37	75.55		14)	28.5	51.1	15.23		14)	1.78	0.79	4.96
15)	65.8	147.8	35.7		15)	27.44	12.08	13.37		15)	47.88	42.13	73.28		15)	24.68	45.79	13.35		15)	1.94	0.92	5.49
16)	68.3	162.2	32.6		16)	22.79	10.61	14.83		16)	49.83	41.33	73.09		16)	27.38	48.06	12.08		16)	1.82	0.86	6.05
17)	66.2	158.3	30		17)	25.11	3.41	10.01		17)	48.43	43.52	76.44		17)	26.46	53.07	13.55		17)	1.83	0.82	5.64
18)	69.5	161.1	33.4		18)	25.85	7.52	9.65		18)	48.13	42.22	77.02		18)	26.02	50.26	13.33		18)	1.85	0.84	5.78
19)	72.5	156.1	28.3		19)	19.06	14.81	10.43		19)	51.93	40.59	75.49		19)	29.01	44.6	14.08		19)	1.79	0.91	5.36
20)	65.5	154.8	29.5		20)	29.04	2.16	9.93		20)	46.99	43.18	76.19		20)	23.97	54.66	13.88		20)	1.96	0.79	5.49

## Sheet: Лист9
Changes in blood biochemical parameters in study participants before exercise,n=60															Groups of participants:
															А -men of early mature age;
															В - men of late mature age;
															С - elderly men;
	Creatine phosphokinase activity, U/L					Lactate Dehydrogenase, U/L					Cortisol, nmol/L					Testosterone, nmol/L
	group A	group B	group C			group A	group B	group C			group A	group B	group C			group A	group B	group C
1)	62.01	139.58	44		1)	207.45	209.38	214.59		1)	189.78	259.43	287.87		1)	15.97	16.94	8.65
2)	55.67	137.43	40.9		2)	241.17	226.13	231.75		2)	210.14	245.49	306.95		2)	16.34	17.99	8.64
3)	60.21	141.02	43.89		3)	224.14	209.75	220.13		3)	247.34	278.92	308.48		3)	17	19.34	8.93
4)	69.93	128.3	44.78		4)	209.56	205.45	230.29		4)	254.32	269.14	305.45		4)	16.89	18.57	9.07
5)	58.1	135.64	45.01		5)	227.38	228.95	212.96		5)	232.94	281.42	325.14		5)	16.54	18.93	8.67
6)	64.29	129.89	39.48		6)	198.67	217.64	216.82		6)	249.18	266.66	310.67		6)	16.05	20.05	8.81
7)	59.61	138.45	44.22		7)	231.19	202.74	227.74		7)	238.39	277.19	295.75		7)	15.89	18.45	8.99
8)	50.38	122.89	44.37		8)	224.54	215.78	223.68		8)	199.32	249.52	319.29		8)	17.11	19.11	8.69
9)	52.73	133.29	44.09		9)	225.78	205.55	230.75		9)	254.32	284.05	317.46		9)	16.5	17.82	9.33
10)	56.55	125.65	45.25		10)	211.66	231.01	219.11		10)	261.15	271.3	286.78		10)	16.33	18.56	8.78
11)	60.07	138.28	43.57		11)	219.98	197.65	218.67		11)	228.45	266.48	337.33		11)	16.45	18.89	8.95
12)	51.43	152.11	43.98		12)	230.17	224.23	220.63		12)	236.54	259.88	315.5		12)	16.28	19.06	9.24
13)	59.32	136.27	44.53		13)	202.22	212.76	230.72		13)	218.44	265.17	327.56		13)	16.77	19.16	8.86
14)	62.71	137.14	45.61		14)	210.01	210.01	211.75		14)	232.88	254.92	335.11		14)	16.04	18.64	8.73
15)	55.75	125.22	39.97		15)	234.17	225.03	231.8		15)	243	275.39	310.05		15)	15.77	18.39	8.94
16)	70.8	141.58	44.09		16)	208.96	208.96	215.26		16)	209.43	269.43	298.25		16)	17	19	8.85
17)	56.86	133.54	44.87		17)	198.83	213.1	220.41		17)	231.43	259.93	304.89		17)	16.35	17.92	8.91
18)	49.67	144.28	45		18)	229.43	229.43	217.43		18)	234.42	255.37	320		18)	16.62	18.8	9.41
19)	55.14	136.15	43.29		19)	215.22	220	213		19)	218.18	268	319.06		19)	16.47	19.78	9.65
20)	59.47	126	44.29		20)	233.01	213.78	219.05		20)	231.34	268.93	314.01		20)	16.39	18.48	8.97

## Sheet: Лист10
Blood biochemical parameters in the blood serum of study participants after the first control test,n=60															Groups of participants:
															А - men of early mature age;
															В - men of late mature age;
															С - elderly men;
	Creatine phosphokinase activity, U/L					Lactate Dehydrogenase, U/L					Cortisol, nmol/L					Testosterone, nmol/L
	group A	group B	group C			group A	group B	group C			group A	group B	group C			group A	group B	group C
1)	68.89	158.87	125.69		1)	416.33	210.39	220.79		1)	578.95	291.43	425.76		1)	20.43	20.87	12.78
2)	72.14	193.66	133.14		2)	449	228.73	235.71		2)	543.32	311.49	453.27		2)	19.76	23.76	14.87
3)	70.87	177.49	128.25		3)	438.65	239.65	229.66		3)	538.34	300.02	412.67		3)	22.82	22.19	13.94
4)	67.13	180.45	130.78		4)	422.22	234.49	231.59		4)	602.12	320.58	398.74		4)	23.19	25.02	14.06
5)	68.79	184.34	132.78		5)	431.57	239.96	218.96		5)	543.12	314.44	449.23		5)	22.03	21.83	15.4
6)	73.11	178.57	136.56		6)	408.44	229.8	227.82		6)	530.56	287.68	428.65		6)	21.61	23.69	14.46
7)	65.43	169.44	129.41		7)	447.35	240.74	236.74		7)	536.23	296.49	409.77		7)	21.02	23.55	13.77
8)	66.98	185.29	135.71		8)	411.57	226.78	228.88		8)	611	323.25	445.45		8)	20.67	24.09	15.11
9)	70.43	179.44	125.55		9)	473.24	235.75	231.05		9)	561.16	307.77	420.79		9)	20.45	22.12	12.97
10)	69.06	187.03	132.66		10)	436.54	238.01	227.61		10)	555.34	311	434.75		10)	21.3	22.87	14.21
11)	70.32	194.28	134.27		11)	466.1	218.67	230.63		11)	561.05	300.56	451.79		11)	22.05	21.69	14.89
12)	67.77	175.39	133.05		12)	432.32	230.43	227.73		12)	539.23	315.92	433.33		12)	21.67	24.11	13.88
13)	70.18	190	126.16		13)	410.07	240.72	229.41		13)	498.19	287.78	419.1		13)	23.03	23.77	14.45
14)	72.81	188.34	137.26		14)	433.03	226.05	235.75		14)	548.25	310.11	448.85		14)	21.44	21.46	14.09
15)	69.45	178.23	128.87		15)	429.99	231.8	234.9		15)	574.12	326.43	430.59		15)	20.35	23.58	13.16
16)	67.88	180.05	131.55		16)	432.3	235.16	235.26		16)	525	330	425.04		16)	20	23.41	14.19
17)	69.43	174.87	132.95		17)	437.5	222.4	226.43		17)	528.01	302.77	433.77		17)	19.88	24.89	15.07
18)	70.23	200.54	136		18)	422.88	241.43	229.29		18)	482.08	315.43	416.64		18)	21.74	20.91	14.82
19)	67.44	159.34	133.62		19)	446.62	233	226		19)	567	299.78	433.91		19)	20.86	22.66	14.23
20)	71.72	179.54	130		20)	429.58	223.98	225.98		20)	532.34	308.95	429.71		20)	22	23.09	14.7

[truncated: 1 more sheets: Лист11]
